# Supplementary material
Source: PubMed Central journal article supplement (PMC6401313)
Supplement: NIHMS1518114-supplement-1.pdf [file NIHMS1518114-supplement-1.pdf]

## Supplemental Figure 1

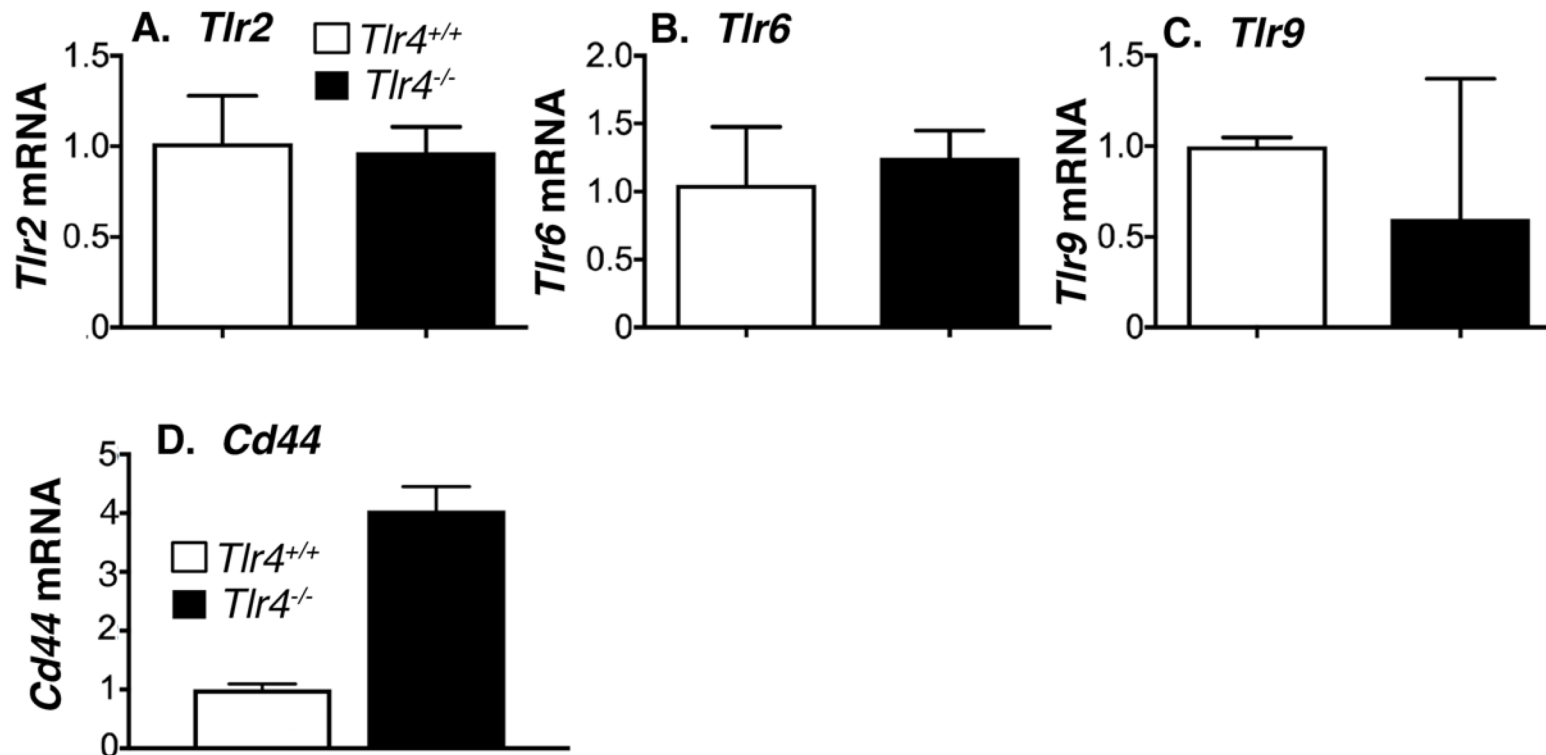

**Supplemental Figure 1.** *Tlr2*, *Tlr6*, *Tlr9*, and *Cd44* expression is similar in *Tlr4*<sup>-/-</sup> and control wound myeloid cells. A-D. C57BL/6 mice were wounded using a 4 mm punch biopsy and wound myeloid cells CD11b<sup>+</sup>[CD3<sup>-</sup>CD19<sup>-</sup>Ly6G<sup>-</sup>] were isolated on post wounding day 3 using MACS. *Tlr2*, *Tlr6*, *Tlr9* and *Cd44* gene expression was compared between *Tlr4*<sup>-/-</sup> mice and controls (n=5, repeated 2X in triplicate). All data are expressed as the mean ± the standard error of the means (SEM).

## Supplemental Figure 2

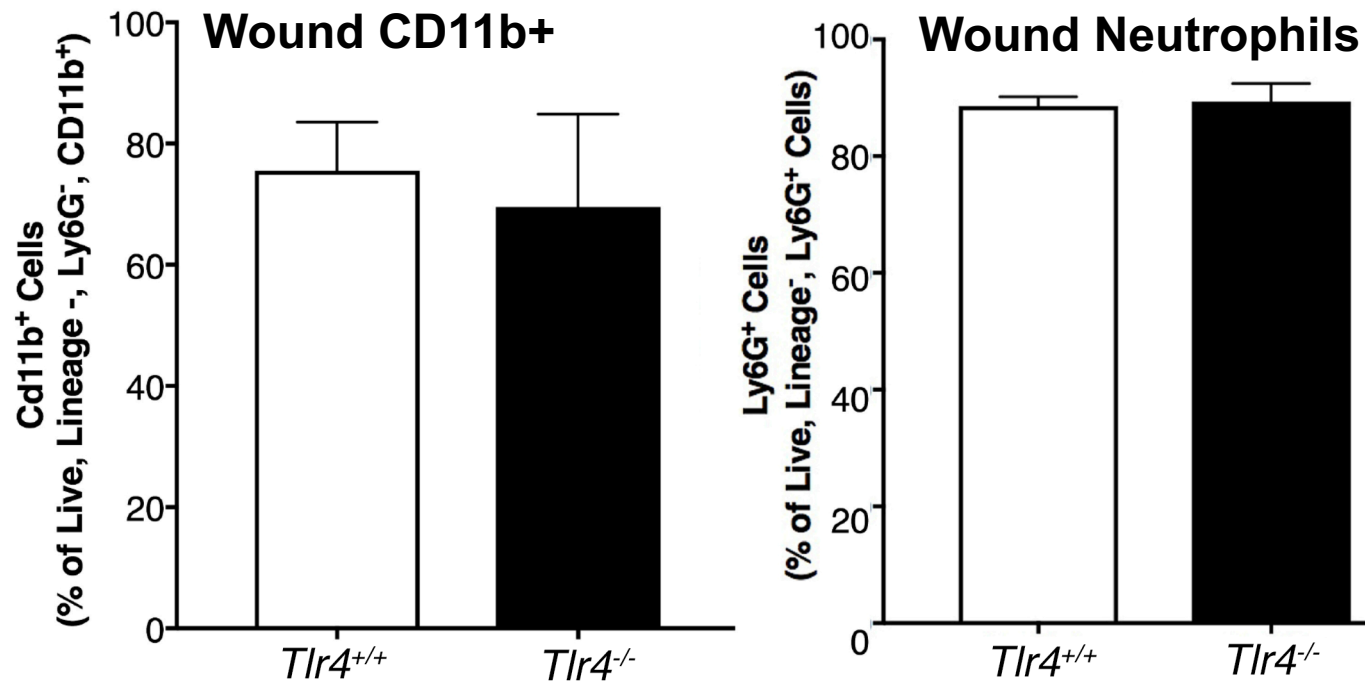

**Supplemental Figure 2.** Myeloid cells and neutrophils are similar in *Tlr4*<sup>-/-</sup> and control wounds. Wounds were created using a 4mm punch biopsy on the back of male C57BL/6 mice. Wounds were harvested on day 3 postinjury and analyzed by flow cytometry. A: The percentage of Live, lin<sup>-</sup>, Ly6G<sup>-</sup>, CD11b<sup>+</sup> cells in *Tlr4*<sup>-/-</sup> and littermate controls is shown. B: The percentage of Live, lin<sup>-</sup>, Ly6G<sup>+</sup> cells in *Tlr4*<sup>-/-</sup> and littermate controls is shown (Data is representative of two independent experiments with n=4 per experiment). All data are expressed as the mean ± the standard error of the means (SEM).
